# Supplementary material for: Solvent selection and Pt decoration towards enhanced photocatalytic CO2 reduction over CsPbBr3 perovskite single crystals
Source: Royal Society of Chemistry journal article supplement (doi:10.1039/c9se01218d), 2020-01-01
Supplement: c9se01218d1.pdf [file c9se01218d1.pdf]

## Electronic supplementary information

### Solvent selection and Pt decoration towards enhanced photocatalytic CO<sub>2</sub> reduction over CsPbBr<sub>3</sub> perovskite single crystal

Yi-Xin Chen, Yang-Fan Xu,\* Xu-Dong Wang, Hong-Yan Chen and Dai-Bin Kuang\*

*MOE Key Laboratory of Bioinorganic and Synthetic Chemistry, Lehn Institute of Functional Materials, School of Chemistry, Sun Yat-sen University, Guangzhou 510275, P. R. China*

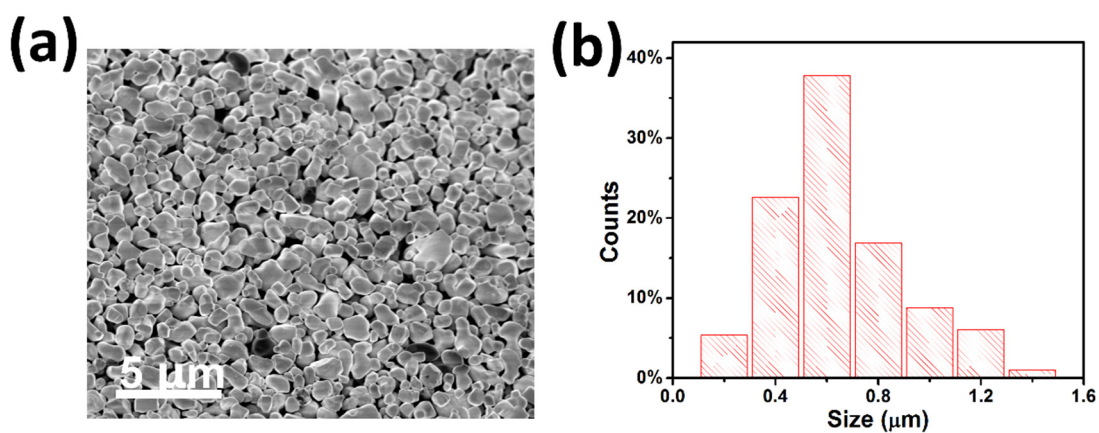

**Fig. S1** (a) SEM image and (b) particle size distribution of the as-prepared CsPbBr<sub>3</sub>.

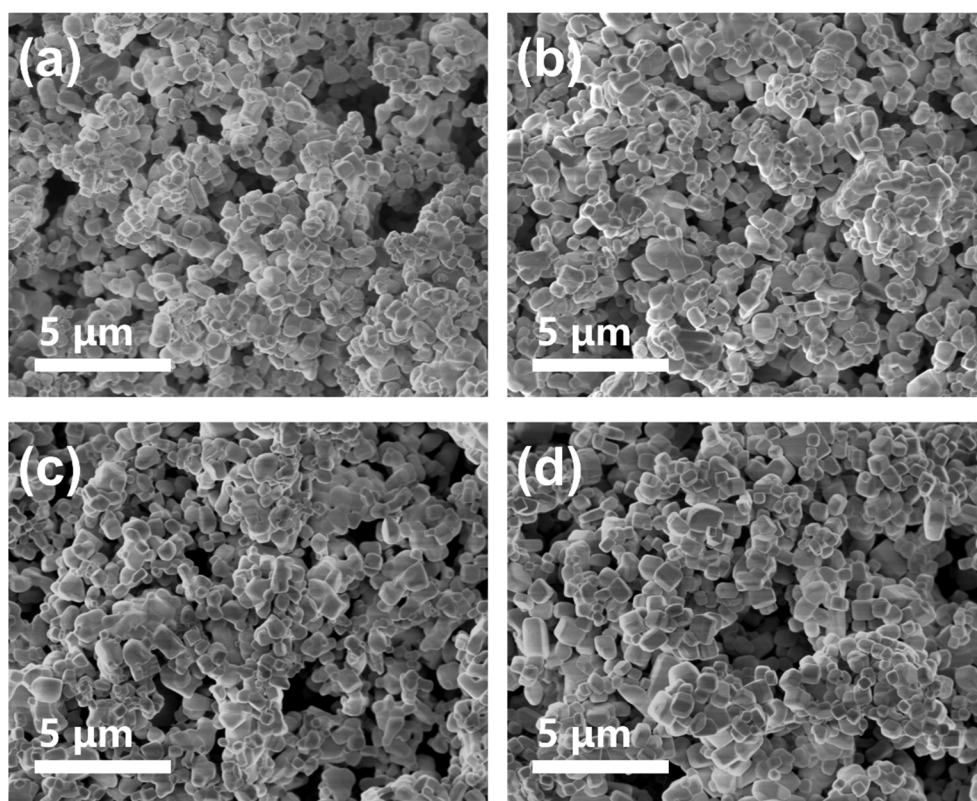

**Fig. S2** SEM images of the CsPbBr<sub>3</sub> after 6 h photocatalytic reaction in various solvents: (a) toluene, (b) ethyl acetate, (c) iso-propanol and (d) acetonitrile.

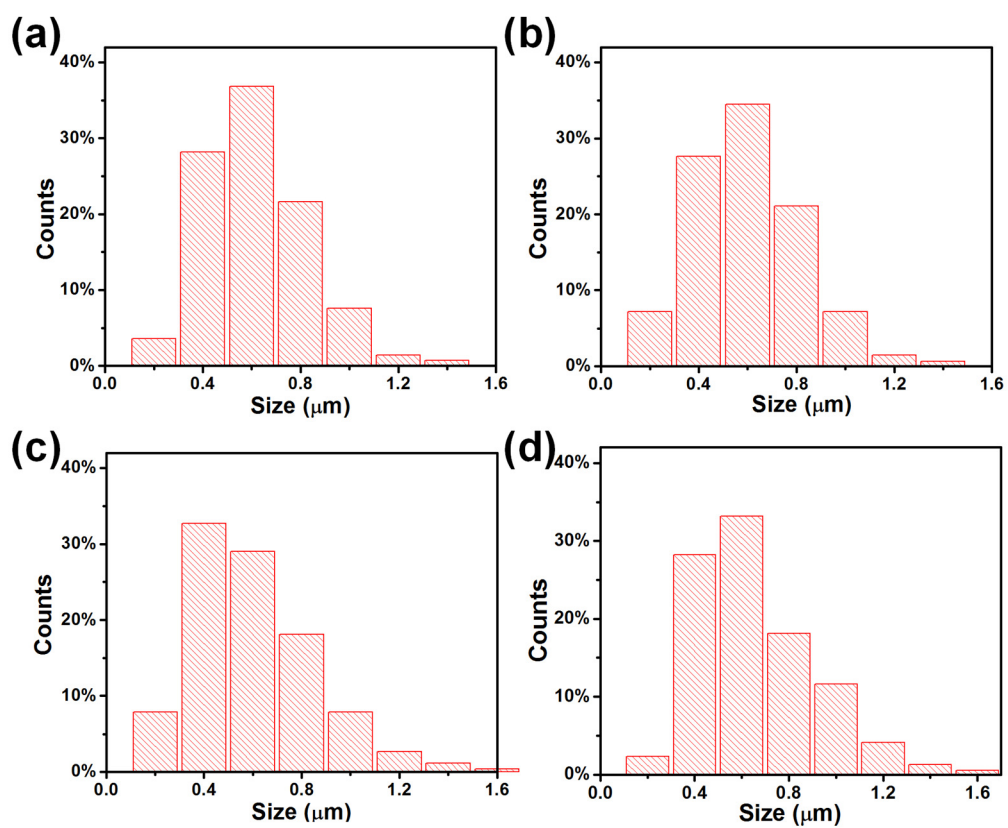

**Fig. S3** Size distribution statistics of the CsPbBr<sub>3</sub> crystals after 6 h reaction in (a) toluene, (b) ethyl acetate, (c) iso-propanol and (d) acetonitrile.

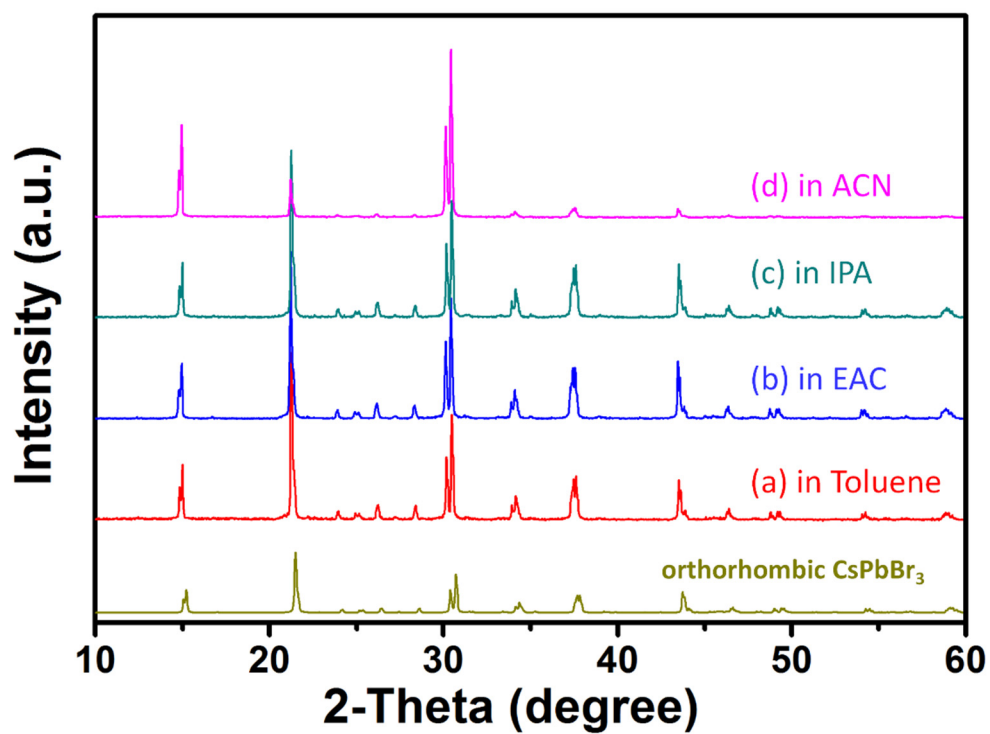

**Fig. S4** XRD patterns of CsPbBr<sub>3</sub> storing in various solvents for 50 days: (a) toluene, (b) ethyl acetate, (c) iso-propanol and (d) acetonitrile. Bottom is the standard XRD patterns for orthorhombic phase of CsPbBr<sub>3</sub>.

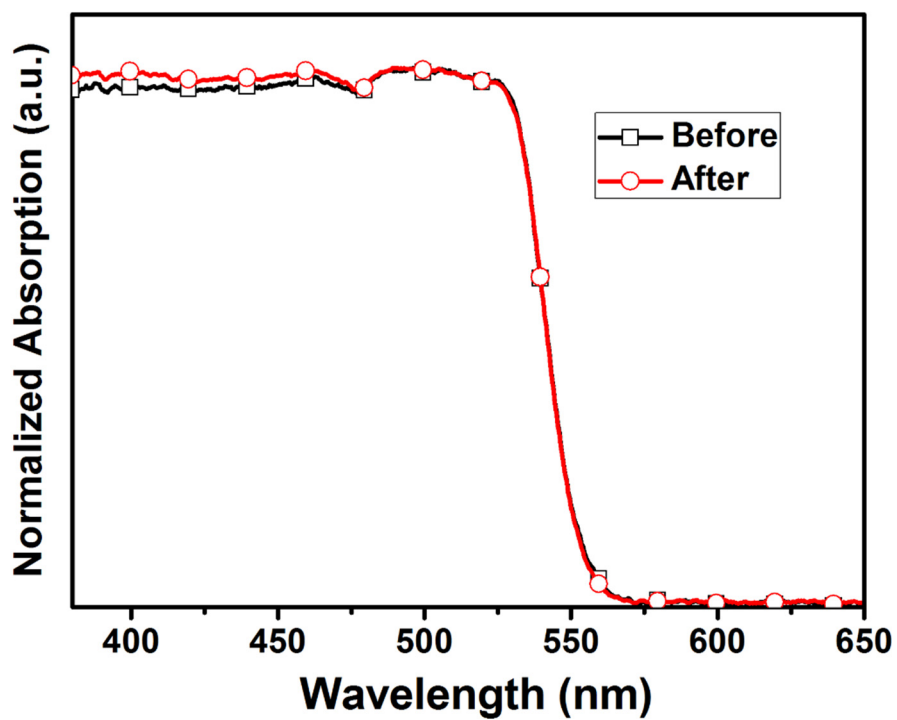

**Fig. S5** UV-vis absorption spectra of the CsPbBr<sub>3</sub> before and after photocatalytic reaction of CO<sub>2</sub> in ethyl acetate.

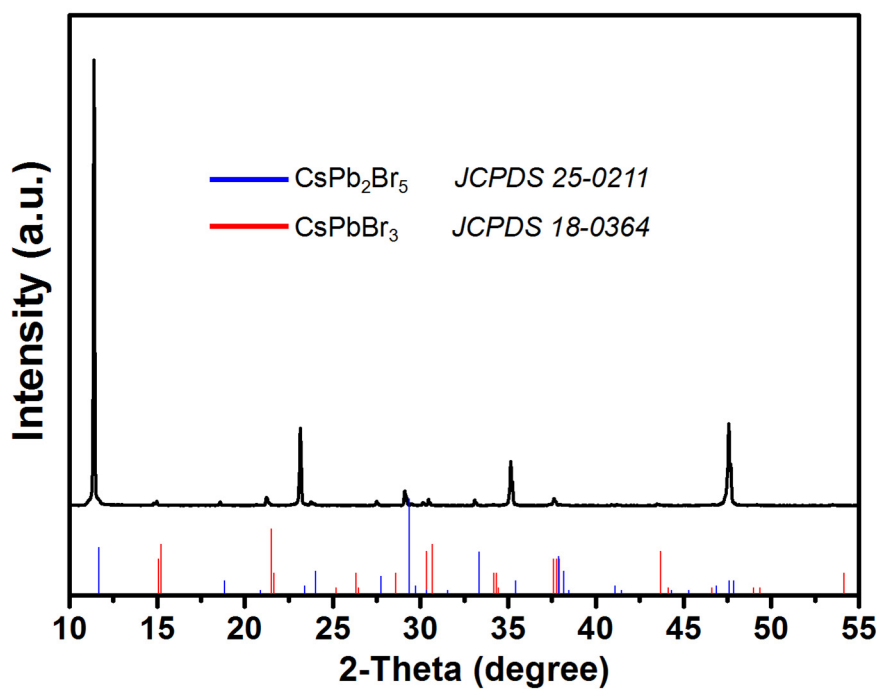

**Fig. S6** XRD pattern of the CsPbBr<sub>3</sub> after storing in methanol for 6 h. The evolution from perovskite CsPbBr<sub>3</sub> to tetragonal CsPb<sub>2</sub>Br<sub>5</sub> can be illustrated based on the following reaction mechanism:  $2\text{CsPbBr}_3 \rightarrow \text{CsPb}_2\text{Br}_5 + 2\text{CsBr}$ .

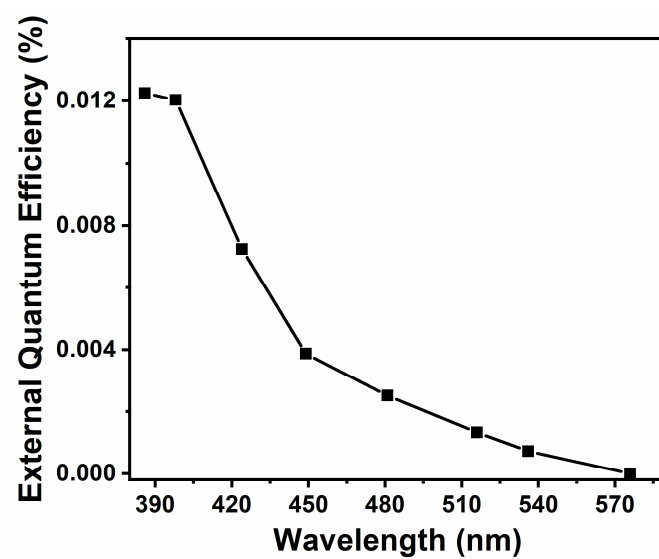

**Fig. S7** External quantum efficiencies as a function of wavelength of incident light on CsPbBr<sub>3</sub> photocatalyst in ethyl acetate.

(a)

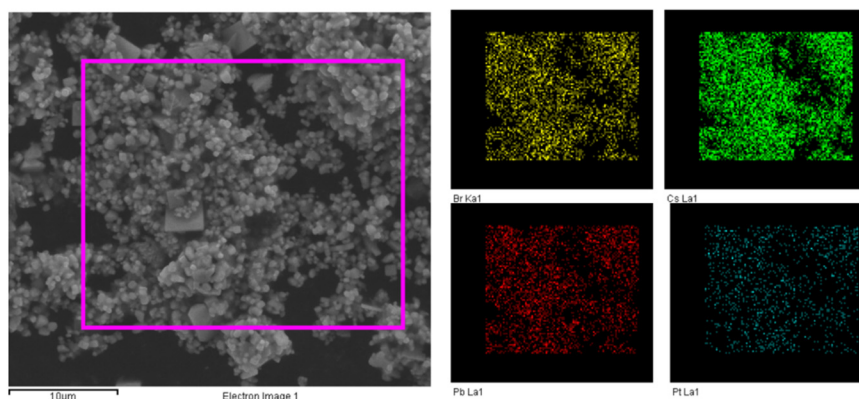

(b)

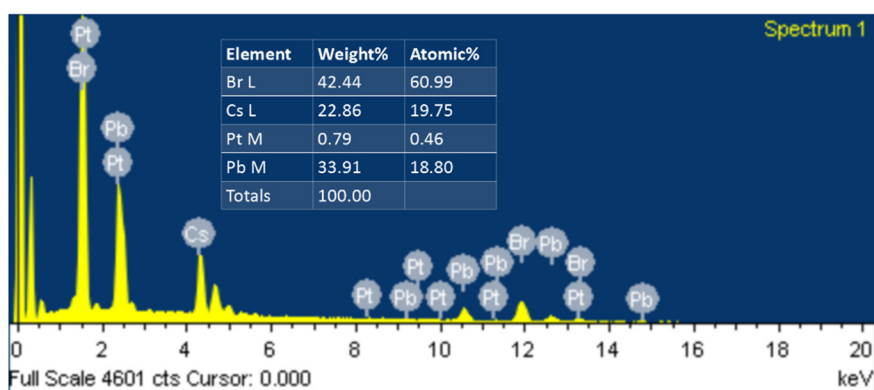

**Fig. S8** Energy dispersive X-ray (EDX) analysis: (a) Elemental mapping for the rectangular area (purple box), indicating homogeneous dispersion of Pt on CsPbBr<sub>3</sub>. (b) EDX spectroscopy and the related quantitative analysis results.



**Table S1.** The results of the reference experiments

|                                              | <b>R<sub>CO</sub></b> |
|----------------------------------------------|-----------------------|
| without CsPbBr <sub>3</sub><br>photocatalyst | n.d.                  |
| CO <sub>2</sub> replaced by N <sub>2</sub>   | 0.001 μmol/g h        |
| without illumination                         | n.d.                  |

CO is not detectable (n.d.) under the absence of CsPbBr<sub>3</sub> or incident light. Moreover, if the saturated CO<sub>2</sub> was replaced by N<sub>2</sub>, the CO evolution rate was drastically decreased to 0.001 μmol/g h, implying that the evolution of CO is not originated from the decomposition of the solvents.

### Supplementary Note 1. The calculation of the external quantum efficiency (EQE)

The external quantum efficiency (EQE) was performed with the assistance of the Zahner Zennium C-IMPS system (TLS-03). The photosynthesis tests were conducted and detected in an identical process, except the monochromatic incident light provided by a light-emitting diodes (LEDs).

In this study, the EQE is defined as the ratio of the photocatalytic electron consumption ( $N_{\text{electron}}$ ) to the photons flux per hour ( $N_{\text{photon}}$ ) within a specialized wavelength range, which can be illustrate as the followed formula:

$$\text{EQE (\%)} = N_{\text{electron}} / N_{\text{photon}}$$
$$= [2N(\text{CO}) + 8N(\text{CH}_4) + 2N(\text{H}_2)] / N_{\text{photon}}$$

The calculation of  $N_{\text{electron}}$  is based on the fact that two electrons are required to produce one molecule CO or H<sub>2</sub>, while 8 electrons for the one molecule CH<sub>4</sub>, according to the equations mentioned in the manuscript. The  $N_{\text{photon}}$  is calculated using the equation:

$$N_{\text{photon}} = [\text{Light intensity} * \text{Illumination area} * \text{Time}] / [\text{Average single photon energy} * N_A]$$

where the illumination area is controlled to 0.82 cm<sup>2</sup>,  $N_A$  is the Avogadro constant and the average single photon energy ( $E_{\text{photon}}$ ) is figured out using the equation:

$$E_{\text{photon}} = hc / \lambda$$

where  $h$  is the Planck constant,  $c$  indicates speed of light, and  $\lambda$  is the wavelength. The related parameters of the incident light are summarized in Table S2.

**Table S2.** The information of the incident light used in EQE tests.

| Wavelength /nm | Light Intensity /W m <sup>-2</sup> | Average single photon energy /J | $N_{\text{photon}}$ / $\mu\text{mol h}^{-1}$ |
|----------------|------------------------------------|---------------------------------|----------------------------------------------|
| 386            | 74.1                               | 5.15 E-19                       | 70.61                                        |
| 398            | 62.5                               | 4.99 E-19                       | 61.41                                        |
| 424            | 183.98                             | 4.69 E-19                       | 192.57                                       |
| 449            | 215.2                              | 4.42 E-19                       | 238.52                                       |
| 481            | 165.4                              | 4.12 E-19                       | 196.39                                       |
| 516            | 101.7                              | 3.84 E-19                       | 129.54                                       |
| 536            | 87.6                               | 3.71 E-19                       | 115.91                                       |
| 576            | 119.49                             | 3.45 E-19                       | 169.90                                       |
